# Supplementary material
Source: PubMed Central journal article supplement (PMC7042876)
Supplement: jamadermatol-156-258-s001.pdf [file jamadermatol-156-258-s001.pdf]

## Supplementary Online Content

Armstrong AW, Puig L, Joshi A, et al. Comparison of biologics and oral treatments for plaque psoriasis: a meta-analysis. *JAMA Dermatol*. Published online February 5, 2020. doi:10.1001/jamadermatol.2019.4029

**eTable 1.** List of clinical trials

**eFigure 1.** Estimated odds ratios from the NMA of short-term PASI (base-case)

**eTable 2.** Estimated response rates from the NMA of short-term PASI (sensitivity analyses including global trials only, including phase III trials only, and in an expanded treatment space)

**eFigure 2.** Estimated odds ratios from the meta-analysis of long-term PASI (base-case)

**eTable 3.** Estimated response rates from the meta-analysis of long-term PASI (sensitivity analyses: including global trials only, including trials reporting NRI data, and including phase III trials only)

**eFigure 3.** Evidence network for NMA of long-term PASI

**eTable 4.** Estimated response rates from the NMA of long-term PASI

**eTable 5.** Estimated Odds Ratios for PASI 90 from the NMA of long-term PASI

This supplementary material has been provided by the authors to give readers additional information about their work.

**eTable 1.** List of clinical trials

| <b>Trial Name</b>                                     | <b>Phase</b> | <b>Treatment Arm</b>                                          | <b>Time Point</b> | <b>N</b> | <b>PASI 50 (%)</b> | <b>PASI 75 (%)</b> | <b>PASI 90 (%)</b> | <b>PASI 100 (%)</b> |
|-------------------------------------------------------|--------------|---------------------------------------------------------------|-------------------|----------|--------------------|--------------------|--------------------|---------------------|
| <b>Clinical trials included in the short-term NMA</b> |              |                                                               |                   |          |                    |                    |                    |                     |
| Asahina                                               | 2/3          | Placebo                                                       | 16                | 46       | 19.6               | 4.4                | 0                  |                     |
| Asahina                                               | 2/3          | Adalimumab 80 mg at week 0, then 40 mg EOW starting at week 1 | 16                | 43       | 81.4               | 62.8               | 39.5               |                     |
| Bissonnette                                           | 4            | Placebo                                                       | 16                | 10       |                    | 20                 |                    |                     |
| Bissonnette                                           | 4            | Adalimumab 80 mg at week 0, then 40 mg EOW starting at week 1 | 16                | 20       |                    | 70                 |                    |                     |
| REVEAL                                                | 3            | Placebo                                                       | 16                | 398      |                    | 6.5                |                    |                     |
| REVEAL                                                | 3            | Adalimumab 80 mg at week 0, then 40 mg EOW starting at week 1 | 16                | 814      |                    | 71                 |                    |                     |
| CHAMPION                                              | 3            | Placebo                                                       | 16                | 53       | 30.2               | 18.9               | 11.3               | 1.9                 |
| CHAMPION                                              | 3            | Methotrexate (low dose)                                       | 16                | 110      | 51.8               | 35.5               | 13.6               | 7.3                 |
| CHAMPION                                              | 3            | Adalimumab 80 mg at week 0, then 40 mg EOW starting at week 1 | 16                | 108      | 88                 | 79.6               | 51.9               | 16.7                |
| Gordon 2006                                           | 2            | Placebo                                                       | 12                | 52       |                    | 3.9                |                    | 0                   |

| <b>Trial Name</b> | <b>Phase</b> | <b>Treatment Arm</b>                                             | <b>Time Point</b> | <b>N</b> | <b>PASI 50 (%)</b> | <b>PASI 75 (%)</b> | <b>PASI 90 (%)</b> | <b>PASI 100 (%)</b> |
|-------------------|--------------|------------------------------------------------------------------|-------------------|----------|--------------------|--------------------|--------------------|---------------------|
| Gordon 2006       | 2            | Adalimumab 80 mg at week 0, then 40 mg<br>EOW starting at week 1 | 12                | 45       |                    | 53.3               |                    | 11.1                |
| Cai 2017          | 3            | Placebo                                                          | 12                | 87       |                    | 11.5               | 3.4                | 1.1                 |
| Cai 2017          | 3            | Adalimumab 80 mg at week 0, then 40 mg<br>EOW starting at week 1 | 12                | 338      |                    | 77.8               | 55.6               | 13.3                |
| Goldminz 2015     | 4            | Methotrexate (low dose)                                          | 16                | 15       |                    | 26.7               |                    |                     |
| Goldminz 2015     | 4            | Adalimumab 80 mg at week 0, then 40 mg<br>EOW starting at week 1 | 16                | 15       |                    | 66.7               |                    |                     |
| Leonardi          | 3            | Placebo                                                          | 12                | 166      | 14.5               | 3.6                | 0.6                |                     |
| Leonardi          | 3            | Etanercept 25 mg BIW / 50 mg QW                                  | 12                | 162      | 58                 | 34                 | 11.7               |                     |
| Papp              | 3            | Placebo                                                          | 12                | 193      | 9.3                | 3.1                | 0.5                |                     |
| Papp              | 3            | Etanercept 25 mg BIW / 50 mg QW                                  | 12                | 196      | 64.3               | 34.2               | 10.7               |                     |
| van de Kerkhof    | 3            | Placebo                                                          | 12                | 46       | 8.7                | 2.2                | 2.2                |                     |
| van de Kerkhof    | 3            | Etanercept 25 mg BIW / 50 mg QW                                  | 12                | 96       | 68.8               | 37.5               | 13.5               |                     |
| Gottlieb          | 2            | Placebo                                                          | 12                | 55       | 10.9               | 1.8                | 0                  |                     |
| Gottlieb          | 2            | Etanercept 25 mg BIW / 50 mg QW                                  | 12                | 57       | 70.2               | 29.8               | 10.5               |                     |
| EXPRESS           | 3            | Placebo                                                          | 10                | 77       | 7.8                | 2.6                | 1.3                |                     |

| <b>Trial Name</b> | <b>Phase</b> | <b>Treatment Arm</b>                                | <b>Time Point</b> | <b>N</b> | <b>PASI 50 (%)</b> | <b>PASI 75 (%)</b> | <b>PASI 90 (%)</b> | <b>PASI 100 (%)</b> |
|-------------------|--------------|-----------------------------------------------------|-------------------|----------|--------------------|--------------------|--------------------|---------------------|
| EXPRESS           | 3            | Infliximab 5 mg/kg at weeks 0, 2 and 6, then<br>Q8W | 10                | 301      | 91                 | 80.4               | 57.1               |                     |
| EXPRESS II        | 3            | Placebo                                             | 10                | 208      |                    | 1.9                | 0.5                |                     |
| EXPRESS II        | 3            | Infliximab 5 mg/kg at weeks 0, 2 and 6, then<br>Q8W | 10                | 314      |                    | 75.5               | 45.2               |                     |
| SPIRIT            | 2            | Placebo                                             | 10                | 51       | 21.6               | 5.9                | 2                  |                     |
| SPIRIT            | 2            | Infliximab 5 mg/kg at weeks 0, 2 and 6, then<br>Q8W | 10                | 99       | 97                 | 87.9               | 57.6               |                     |
| Chaudhari         |              | Placebo                                             | 10                | 11       |                    | 18.2               |                    |                     |
| Chaudhari         |              | Infliximab 5 mg/kg at weeks 0, 2 and 6, then<br>Q8W | 10                | 11       |                    | 81.8               |                    |                     |
| Torii             | 3            | Placebo                                             | 10                | 19       | 10.5               | 0                  | 0                  |                     |
| Torii             | 3            | Infliximab 5 mg/kg at weeks 0, 2 and 6, then<br>Q8W | 10                | 35       | 82.9               | 68.6               | 54.3               |                     |
| Yang              |              | Placebo                                             | 10                | 45       | 13.3               | 2.2                | 0                  |                     |
| Yang              |              | Infliximab 5 mg/kg at weeks 0, 2 and 6, then<br>Q8W | 10                | 84       | 94.1               | 81                 | 57.1               |                     |
| UNCOVER 1         | 3            | Placebo                                             | 12                | 431      | 11.6               | 3.9                | 0.5                | 0                   |

| <b>Trial Name</b> | <b>Phase</b> | <b>Treatment Arm</b>                                                           | <b>Time Point</b> | <b>N</b> | <b>PASI 50 (%)</b> | <b>PASI 75 (%)</b> | <b>PASI 90 (%)</b> | <b>PASI 100 (%)</b> |
|-------------------|--------------|--------------------------------------------------------------------------------|-------------------|----------|--------------------|--------------------|--------------------|---------------------|
| UNCOVER 1         | 3            | Ixekizumab 160 mg at week 0, then 80 mg<br>Q2W                                 | 12                | 433      | 93.8               | 89.2               | 70.9               | 35.3                |
| UNCOVER 2         | 3            | Placebo                                                                        | 12                | 168      | 6.6                | 2.4                | 0.6                | 0.6                 |
| UNCOVER 2         | 3            | Ixekizumab 160 mg at week 0, then 80 mg<br>Q2W                                 | 12                | 351      | 94.9               | 89.7               | 70.7               | 40.5                |
| UNCOVER 3         | 3            | Placebo                                                                        | 12                | 193      | 15.5               | 7.3                | 3.1                | 0                   |
| UNCOVER 3         | 3            | Ixekizumab 160 mg at week 0, then 80 mg<br>Q2W                                 | 12                | 385      | 93.8               | 87.3               | 68.1               | 37.7                |
| IXORA-S           | 3            | Ixekizumab 160 mg at week 0, then 80 mg<br>Q2W                                 | 12                | 136      |                    | 88.2               | 72.8               | 36                  |
| IXORA-S           | 3            | Ustekinumab 45 mg < 100 kg, 90 mg > 100 kg<br>at weeks 0 and 4, then Q12W      | 12                | 166      |                    | 68.7               | 42.2               | 14.5                |
| Reich 2017        | 3            | Ixekizumab 160 mg at week 0, then 80 mg<br>Q2W                                 | 12                | 54       |                    | 90.7               | 72.2               | 35.2                |
| Reich 2017        | 3            | Methotrexate (low dose)                                                        | 12                | 54       |                    | 48.1               | 20.4               | 5.6                 |
| ERASURE           | 3            | Placebo                                                                        | 12                | 246      | 8.9                | 4.5                | 1.2                | 0.8                 |
| ERASURE           | 3            | Secukinumab 300 mg at weeks 0, 1, 2, and 3,<br>then monthly starting at week 4 | 12                | 245      | 90.6               | 81.6               | 59.2               | 28.6                |

| <b>Trial Name</b> | <b>Phase</b> | <b>Treatment Arm</b>                                                        | <b>Time Point</b> | <b>N</b> | <b>PASI 50 (%)</b> | <b>PASI 75 (%)</b> | <b>PASI 90 (%)</b> | <b>PASI 100 (%)</b> |
|-------------------|--------------|-----------------------------------------------------------------------------|-------------------|----------|--------------------|--------------------|--------------------|---------------------|
| FEATURE           | 3            | Placebo                                                                     | 12                | 59       | 5.1                | 0                  | 0                  | 0                   |
| FEATURE           | 3            | Secukinumab 300 mg at weeks 0, 1, 2, and 3, then monthly starting at week 4 | 12                | 58       | 87.9               | 75.9               | 60.3               | 43.1                |
| FIXTURE           | 3            | Placebo                                                                     | 12                | 324      | 15.1               | 4.9                | 1.5                | 0                   |
| FIXTURE           | 3            | Secukinumab 300 mg at weeks 0, 1, 2, and 3, then monthly starting at week 4 | 12                | 323      | 91.6               | 77.1               | 54.2               | 24.2                |
| JUNCTURE          | 3            | Placebo                                                                     | 12                | 61       | 8.2                | 3.3                | 0                  | 0                   |
| JUNCTURE          | 3            | Secukinumab 300 mg at weeks 0, 1, 2, and 3, then monthly starting at week 4 | 12                | 60       | 96.7               | 86.7               | 55                 | 26.7                |
| CLEAR             | 3            | Ustekinumab 45 mg < 100 kg, 90 mg > 100 kg at weeks 0 and 4, then Q12W      | 12                | 335      |                    | 79.1               | 53.4               | 25.7                |
| CLEAR             | 3            | Secukinumab 300 mg at weeks 0, 1, 2, and 3, then monthly starting at week 4 | 12                | 334      |                    | 91                 | 72.8               | 38.9                |
| PRIME             | 3            | Fumaric acid esters                                                         | 12                | 95       | 56.8               | 21.1               | 2.1                | 0                   |
| PRIME             | 3            | Secukinumab 300 mg at weeks 0, 1, 2, and 3, then monthly starting at week 4 | 12                | 105      | 97.1               | 87.6               | 63.8               | 28.6                |
| CLARITY           | 3            | Ustekinumab 45 mg < 100 kg, 90 mg > 100 kg at weeks 0 and 4, then Q12W      | 12                | 552      |                    | 74.3               | 47.8               | 20.1                |

| <b>Trial Name</b> | <b>Phase</b> | <b>Treatment Arm</b>                                                        | <b>Time Point</b> | <b>N</b> | <b>PASI 50 (%)</b> | <b>PASI 75 (%)</b> | <b>PASI 90 (%)</b> | <b>PASI 100 (%)</b> |
|-------------------|--------------|-----------------------------------------------------------------------------|-------------------|----------|--------------------|--------------------|--------------------|---------------------|
| CLARITY           | 3            | Secukinumab 300 mg at weeks 0, 1, 2, and 3, then monthly starting at week 4 | 12                | 550      |                    | 88                 | 66.5               | 38.2                |
| ACCEPT            | 3            | Ustekinumab 45 mg at weeks 0 and 4, then Q12W                               | 12                | 209      |                    | 67.5               | 36.4               |                     |
| ACCEPT            | 3            | Ustekinumab 90 mg at weeks 0 and 4, then Q12W                               | 12                | 347      |                    | 73.8               | 44.7               |                     |
| LOTUS             | 3            | Placebo                                                                     | 12                | 162      | 19.8               | 11.1               | 3.1                | 0.6                 |
| LOTUS             | 3            | Ustekinumab 45 mg at weeks 0 and 4, then Q12W                               | 12                | 160      | 91.3               | 82.5               | 66.9               | 23.8                |
| PEARL             | 3            | Placebo                                                                     | 12                | 60       | 13.3               | 5                  | 1.7                | 0                   |
| PEARL             | 3            | Ustekinumab 45 mg at weeks 0 and 4, then Q12W                               | 12                | 61       | 83.6               | 67.2               | 49.2               | 8.2                 |
| PHOENIX 1         | 3            | Placebo                                                                     | 12                | 255      | 10.2               | 3.1                | 2                  | 0                   |
| PHOENIX 1         | 3            | Ustekinumab 45 mg at weeks 0 and 4, then Q12W                               | 12                | 255      | 83.5               | 67.1               | 41.6               | 12.6                |
| PHOENIX 1         | 3            | Ustekinumab 90 mg at weeks 0 and 4, then Q12W                               | 12                | 256      | 85.9               | 66.4               | 36.7               | 10.9                |
| PHOENIX 2         | 3            | Placebo                                                                     | 12                | 410      | 10                 | 3.7                | 0.7                | 0                   |

| <b>Trial Name</b> | <b>Phase</b> | <b>Treatment Arm</b>                                                   | <b>Time Point</b> | <b>N</b> | <b>PASI 50 (%)</b> | <b>PASI 75 (%)</b> | <b>PASI 90 (%)</b> | <b>PASI 100 (%)</b> |
|-------------------|--------------|------------------------------------------------------------------------|-------------------|----------|--------------------|--------------------|--------------------|---------------------|
| PHOENIX 2         | 3            | Ustekinumab 45 mg at weeks 0 and 4, then Q12W                          | 12                | 409      | 83.6               | 66.8               | 42.3               | 18.1                |
| PHOENIX 2         | 3            | Ustekinumab 90 mg at weeks 0 and 4, then Q12W                          | 12                | 411      | 89.3               | 75.7               | 50.9               | 18.3                |
| Igarashi          | 2/3          | Placebo                                                                | 12                | 31       | 12.9               | 6.5                | 3.2                |                     |
| Igarashi          | 2/3          | Ustekinumab 45 mg at weeks 0 and 4, then Q12W                          | 12                | 64       | 82.8               | 59.4               | 32.8               |                     |
| Igarashi          | 2/3          | Ustekinumab 90 mg at weeks 0 and 4, then Q12W                          | 12                | 62       | 83.9               | 67.7               | 43.6               |                     |
| VIP-U             | 4            | Placebo                                                                | 12                | 21       |                    | 9.5                |                    |                     |
| VIP-U             | 4            | Ustekinumab 45 mg < 100 kg, 90 mg > 100 kg at weeks 0 and 4, then Q12W | 12                | 22       |                    | 77.3               |                    |                     |
| X-PLORE           | 2            | Placebo                                                                | 16                | 42       |                    | 4.8                | 2.4                | 0                   |
| X-PLORE           | 2            | Adalimumab 80 mg at week 0, then 40 mg EOW starting at week 1          | 16                | 43       |                    | 69.8               | 44.2               | 25.6                |
| VOYAGE-1          | 3            | Placebo                                                                | 16                | 174      |                    | 5.7                | 2.9                | 0.6                 |
| VOYAGE-1          | 3            | Adalimumab 80 mg at week 0, then 40 mg EOW starting at week 1          | 16                | 334      |                    | 73.1               | 49.7               | 17.1                |



| <b>Trial Name</b> | <b>Phase</b> | <b>Treatment Arm</b>                                          | <b>Time Point</b> | <b>N</b> | <b>PASI 50 (%)</b> | <b>PASI 75 (%)</b> | <b>PASI 90 (%)</b> | <b>PASI 100 (%)</b> |
|-------------------|--------------|---------------------------------------------------------------|-------------------|----------|--------------------|--------------------|--------------------|---------------------|
| VOYAGE-1          | 3            | Guselkumab 100 mg at weeks 0, 4, then Q8W                     | 16                | 329      |                    | 91.2               | 73.3               | 37.4                |
| VOYAGE-2          | 3            | Placebo                                                       | 16                | 248      |                    | 8.1                | 2.4                | 0.8                 |
| VOYAGE-2          | 3            | Adalimumab 80 mg at week 0, then 40 mg EOW starting at week 1 | 16                | 248      |                    | 68.5               | 46.8               | 20.6                |
| VOYAGE-2          | 3            | Guselkumab 100 mg at weeks 0,4, then Q8W                      | 16                | 496      |                    | 86.3               | 70                 | 34.1                |
| ORION             | 3            | Placebo                                                       | 16                | 16       |                    |                    | 0                  | 0                   |
| ORION             | 3            | Guselkumab 100 mg at weeks 0, 4, then Q8W                     | 16                | 62       |                    |                    | 75.8               | 50                  |
| Ohtsuki 2018      | 3            | Placebo                                                       | 16                | 64       | 14.1               | 6.3                | 0                  | 0                   |
| Ohtsuki 2018      | 3            | Guselkumab 100 mg at weeks 0, 4, then Q8W                     | 16                | 63       | 95.2               | 84.1               | 69.8               | 27                  |
| Nakagawa 2016     | 2            | Placebo                                                       | 12                | 38       |                    | 7.9                | 2.6                | 0                   |
| Nakagawa 2016     | 2            | Brodalumab 210 mg at weeks 0, 1, and 2, then Q2W              | 12                | 37       |                    | 94.6               | 91.9               | 59.5                |
| Papp 2012         | 2            | Placebo                                                       | 12                | 38       | 15.8               | 0                  | 0                  | 0                   |
| Papp 2012         | 2            | Brodalumab 210 mg at weeks 0, 1, and 2, then Q2W              | 12                | 40       | 90                 | 82.5               | 75                 | 62.5                |
| AMAGINE-1         | 3            | Placebo                                                       | 12                | 220      |                    | 2.7                | 0.9                | 0.5                 |
| AMAGINE-1         | 3            | Brodalumab 210 mg at weeks 0, 1, and 2, then Q2W              | 12                | 222      |                    | 83.3               | 70.3               | 41.9                |

| <b>Trial Name</b> | <b>Phase</b> | <b>Treatment Arm</b>                                                   | <b>Time Point</b> | <b>N</b> | <b>PASI 50 (%)</b> | <b>PASI 75 (%)</b> | <b>PASI 90 (%)</b> | <b>PASI 100 (%)</b> |
|-------------------|--------------|------------------------------------------------------------------------|-------------------|----------|--------------------|--------------------|--------------------|---------------------|
| AMAGINE-2         | 3            | Placebo                                                                | 12                | 309      |                    | 8.1                | 2.9                | 0.7                 |
| AMAGINE-2         | 3            | Ustekinumab 45 mg < 100 kg, 90 mg > 100 kg at weeks 0 and 4, then Q12W | 12                | 300      |                    | 70                 | 47                 | 21.7                |
| AMAGINE-2         | 3            | Brodalumab 210 mg at weeks 0, 1, and 2, then Q2W                       | 12                | 612      |                    | 86.3               | 70                 | 44.4                |
| AMAGINE-3         | 3            | Placebo                                                                | 12                | 315      |                    | 6                  | 1.9                | 0.3                 |
| AMAGINE-3         | 3            | Ustekinumab 45 mg < 100 kg, 90 mg > 100 kg at weeks 0 and 4, then Q12W | 12                | 313      |                    | 69.3               | 47.9               | 18.5                |
| AMAGINE-3         | 3            | Brodalumab 210 mg at weeks 0, 1, and 2, then Q2W                       | 12                | 624      |                    | 85.1               | 69                 | 36.7                |
| CIMPASI-1         | 3            | Placebo                                                                | 16                | 51       |                    | 6.5                | 0.4                | 0.2                 |
| CIMPASI-1         | 3            | Certolizumab pegol 400 mg at weeks 0, 2, and 4, then 200 mg Q2W        | 16                | 95       |                    | 66.5               | 35.8               | 13.7                |
| CIMPASI-1         | 3            | Certolizumab pegol 400 mg Q2W                                          | 16                | 88       |                    | 75.8               | 43.6               | 12.7                |
| CIMPASI-2         | 3            | Placebo                                                                | 16                | 49       |                    | 11.6               | 4.5                | 1.8                 |
| CIMPASI-2         | 3            | Certolizumab pegol 400 mg at weeks 0, 2, and 4, then 200 mg Q2W        | 16                | 91       |                    | 81.4               | 52.6               | 15.4                |
| CIMPASI-2         | 3            | Certolizumab pegol 400 mg Q2W                                          | 16                | 87       |                    | 82.6               | 55.4               | 18.8                |

| <b>Trial Name</b> | <b>Phase</b> | <b>Treatment Arm</b>                                            | <b>Time Point</b> | <b>N</b> | <b>PASI 50 (%)</b> | <b>PASI 75 (%)</b> | <b>PASI 90 (%)</b> | <b>PASI 100 (%)</b> |
|-------------------|--------------|-----------------------------------------------------------------|-------------------|----------|--------------------|--------------------|--------------------|---------------------|
| CIMPACT           | 2            | Placebo                                                         | 12                | 57       |                    | 5                  | 0.2                |                     |
| CIMPACT           | 2            | Certolizumab pegol 400 mg at weeks 0, 2, and 4, then 200 mg Q2W | 12                | 165      |                    | 61.3               | 31.2               |                     |
| CIMPACT           | 2            | Certolizumab pegol 400 mg Q2W                                   | 12                | 167      |                    | 66.7               | 34                 |                     |
| NCT00245765       | 2            | Placebo                                                         | 12                | 59       | 11.9               | 6.8                | 1.7                |                     |
| NCT00245765       | 2            | Certolizumab pegol 400 mg at week 0, then 200 mg Q2W            | 12                | 59       | 86.4               | 74.6               | 39                 |                     |
| NCT00245765       | 2            | Certolizumab pegol 400 mg Q2W                                   | 12                | 58       | 93.1               | 82.8               | 46.6               |                     |
| reSURFACE-1       | 3            | Placebo                                                         | 12                | 154      |                    | 5.8                | 2.6                | 1.3                 |
| reSURFACE-1       | 3            | Tildrakizumab 100 mg at weeks 0, 4, then Q12W                   | 12                | 309      |                    | 63.8               | 34.6               | 13.9                |
| reSURFACE-1       | 3            | Tildrakizumab 200 mg at weeks 0, 4, then Q12W                   | 12                | 308      |                    | 62.3               | 35.4               | 14                  |
| Papp 2015         | 2            | Placebo                                                         | 16                | 45       |                    | 4.4                | 2.2                |                     |
| Papp 2015         | 2            | Tildrakizumab 100 mg at weeks 0, 4, then Q12W                   | 16                | 89       |                    | 66.3               | 38.2               |                     |
| Papp 2015         | 2            | Tildrakizumab 200 mg at weeks 0, 4, then Q12W                   | 16                | 86       |                    | 74.4               | 51.2               |                     |

| <b>Trial Name</b> | <b>Phase</b> | <b>Treatment Arm</b>                                                   | <b>Time Point</b> | <b>N</b> | <b>PASI 50 (%)</b> | <b>PASI 75 (%)</b> | <b>PASI 90 (%)</b> | <b>PASI 100 (%)</b> |
|-------------------|--------------|------------------------------------------------------------------------|-------------------|----------|--------------------|--------------------|--------------------|---------------------|
| reSURFACE-2       | 3            | Placebo                                                                | 12                | 156      |                    | 6                  | 1                  | 0                   |
| reSURFACE-2       | 3            | Tildrakizumab 100 mg at weeks 0, 4, then Q12W                          | 12                | 307      |                    | 61                 | 39                 | 12.4                |
| reSURFACE-2       | 3            | Tildrakizumab 200 mg at weeks 0, 4, then Q12W                          | 12                | 314      |                    | 66                 | 37                 | 11.8                |
| UltIMMa1          | 3            | Placebo                                                                | 16                | 102      | 21.6               | 8.8                | 4.9                | 0                   |
| UltIMMa1          | 3            | Ustekinumab 45 mg < 100 kg, 90 mg > 100 kg at weeks 0 and 4, then Q12W | 16                | 100      | 89                 | 76                 | 42                 | 12                  |
| UltIMMa1          | 3            | Risankizumab 150 mg at weeks 0, and 4, then Q12W                       | 16                | 304      | 94.1               | 89.1               | 75.3               | 35.9                |
| UltIMMa2          | 3            | Placebo                                                                | 16                | 98       | 16.3               | 6.1                | 2                  | 2                   |
| UltIMMa2          | 3            | Ustekinumab 45 mg < 100 kg, 90 mg > 100 kg at weeks 0 and 4, then Q12W | 16                | 99       | 80.8               | 69.7               | 47.5               | 24.2                |
| UltIMMa2          | 3            | Risankizumab 150 mg at weeks 0, and 4, then Q12W                       | 16                | 294      | 97.6               | 90.8               | 74.8               | 50.7                |
| IMMvent           | 3            | Adalimumab 80 mg at week 0, then 40 mg EOW starting at week 1          | 16                | 304      | 83.6               | 71.7               | 47.4               | 23                  |

| <b>Trial Name</b>      | <b>Phase</b> | <b>Treatment Arm</b>                                             | <b>Time Point</b> | <b>N</b> | <b>PASI 50 (%)</b> | <b>PASI 75 (%)</b> | <b>PASI 90 (%)</b> | <b>PASI 100 (%)</b> |
|------------------------|--------------|------------------------------------------------------------------|-------------------|----------|--------------------|--------------------|--------------------|---------------------|
| IMMvent                | 3            | Risankizumab 150 mg at weeks 0, and 4, then<br>Q12W              | 16                | 301      | 97                 | 90.7               | 72.4               | 39.9                |
| IMMhance               | 3            | Placebo                                                          | 16                | 100      | 19                 | 8                  | 2                  | 1                   |
| IMMhance               | 3            | Risankizumab 150 mg at weeks 0, and 4, then<br>Q12W              | 16                | 407      | 95.6               | 88.7               | 73.2               | 47.2                |
| BRIDGE                 | 3            | Placebo                                                          | 16                | 131      | 29                 | 15.3               | 4.6                |                     |
| BRIDGE                 | 3            | Fumaric acid esters                                              | 16                | 273      | 61.9               | 40.3               | 22.3               |                     |
| BRIDGE                 | 3            | Dimethyl fumarate                                                | 16                | 267      | 53.6               | 37.5               | 18.4               |                     |
| Altmeyer 1994          |              | Placebo                                                          | 16                | 51       |                    | 2                  |                    |                     |
| Altmeyer 1994          |              | Fumaric acid esters                                              | 16                | 49       |                    | 24.5               |                    |                     |
| PSOR-008 /<br>ESTEEM-1 | 3            | Placebo                                                          | 16                | 282      | 17                 | 5.3                | 0.4                |                     |
| PSOR-008 /<br>ESTEEM-1 | 3            | Apremilast 30 mg twice daily after initial<br>titration schedule | 16                | 562      | 58.7               | 33.1               | 9.8                |                     |
| PSOR-009 /<br>ESTEEM-2 | 3            | Placebo                                                          | 16                | 137      | 19.7               | 5.8                | 1.5                |                     |
| PSOR-009 /<br>ESTEEM-2 | 3            | Apremilast 30 mg twice daily after initial<br>titration schedule | 16                | 274      | 55.5               | 28.8               | 8.8                |                     |

| <b>Trial Name</b>   | <b>Phase</b> | <b>Treatment Arm</b>                                          | <b>Time Point</b> | <b>N</b> | <b>PASI 50 (%)</b> | <b>PASI 75 (%)</b> | <b>PASI 90 (%)</b> | <b>PASI 100 (%)</b> |
|---------------------|--------------|---------------------------------------------------------------|-------------------|----------|--------------------|--------------------|--------------------|---------------------|
| PSOR-010 / LIBERATE | 3b           | Placebo                                                       | 16                | 84       | 33.3               | 11.9               | 3.6                |                     |
| PSOR-010 / LIBERATE | 3b           | Etanercept 25 mg BIW / 50 mg QW                               | 16                | 83       | 83.1               | 48.2               | 20.5               |                     |
| PSOR-010 / LIBERATE | 3b           | Apremilast 30 mg twice daily after initial titration schedule | 16                | 83       | 62.7               | 39.8               | 14.5               |                     |
| PSOR-005            | 2b           | Placebo                                                       | 16                | 88       | 25                 | 5.7                | 1.1                |                     |
| PSOR-005            | 2b           | Apremilast 30 mg twice daily after initial titration schedule | 16                | 88       | 60.2               | 40.9               | 11.4               |                     |
| Ohtsuki 2017        | 2b           | Placebo                                                       | 16                | 84       | 21.4               | 7.1                | 1.2                |                     |
| Ohtsuki 2017        | 2b           | Apremilast 30 mg twice daily after initial titration schedule | 16                | 85       | 50.6               | 28.2               | 14.1               |                     |
| Gisoni 2008         |              | Etanercept 25 mg BIW / 50 mg QW                               | 12                | 22       | 40.9               | 22.7               |                    |                     |
| Gisoni 2008         |              | Acitretin 0.4 mg/kg daily                                     | 12                | 20       | 20                 | 10                 |                    |                     |
| Meffert 1997        |              | Placebo                                                       | 10                | 43       | 11.6               | 4.7                |                    |                     |
| Meffert 1997        |              | Ciclosporin 2.5–3 mg/kg/day                                   | 10                | 44       | 56.8               | 29.5               |                    |                     |
| RESTORE1            | 3b           | Infliximab 5 mg/kg at weeks 0, 2 and 6, then Q8W              | 16                | 653      | 86.8               | 77.8               | 54.5               |                     |

| <b>Trial Name</b>                                              | <b>Phase</b> | <b>Treatment Arm</b>                                | <b>Time Point</b> | <b>N</b> | <b>PASI 50 (%)</b> | <b>PASI 75 (%)</b> | <b>PASI 90 (%)</b> | <b>PASI 100 (%)</b> |
|----------------------------------------------------------------|--------------|-----------------------------------------------------|-------------------|----------|--------------------|--------------------|--------------------|---------------------|
| RESTORE1                                                       | 3b           | Methotrexate (high dose)                            | 16                | 215      | 60.5               | 41.9               | 19.1               |                     |
| Heydendael 2003                                                |              | Methotrexate (high dose)                            | 16                | 43       |                    | 60.5               | 39.5               |                     |
| Heydendael 2003                                                |              | Ciclosporin 2.5–3 mg/kg/day                         | 16                | 42       |                    | 71.4               | 33.3               |                     |
| Fallah 2011                                                    |              | Methotrexate (low dose)                             | 12                | 25       | 60                 | 24                 | 8                  |                     |
| Fallah 2011                                                    |              | Fumaric acid esters                                 | 12                | 26       | 42.3               | 19.2               | 3.8                |                     |
| Flytstrom 2007                                                 |              | Methotrexate (low dose)                             | 12                | 37       | 64.9               | 24.3               | 10.8               |                     |
| Flytstrom 2007                                                 |              | Ciclosporin 2.5–3 mg/kg/day                         | 12                | 31       | 87.1               | 58.1               | 29                 |                     |
| <b>Clinical trials included in the long-term meta-analysis</b> |              |                                                     |                   |          |                    |                    |                    |                     |
| LIBERATE                                                       | 3b           | Apremilast 30 mg BID                                | 52                | 74       | 70.3               | 52.7               | 17.6               |                     |
| Ohtsuki 2017                                                   | 2b           | Apremilast 30 mg BID                                | 52                | 85       |                    | 40.0               |                    |                     |
| PSOR-005/PSOR-005E                                             | 2            | Apremilast 30 mg BID                                | 52                | 58       | 72.4               | 36.2               | 13.8               |                     |
| FIXTURE                                                        | 3            | Etanercept 50 mg BIW until week 12, then<br>QW      | 52                | 323      |                    | 55.5               | 33.4               | 10.1                |
| EXPRESS                                                        | 3            | Infliximab 5 mg/kg at week 0, 2, and 6, then<br>Q8W | 50                | 281      | 68.7               | 60.5               | 45.2               |                     |

| <b>Trial Name</b> | <b>Phase</b> | <b>Treatment Arm</b>                                  | <b>Time Point</b> | <b>N</b> | <b>PASI 50 (%)</b> | <b>PASI 75 (%)</b> | <b>PASI 90 (%)</b> | <b>PASI 100 (%)</b> |
|-------------------|--------------|-------------------------------------------------------|-------------------|----------|--------------------|--------------------|--------------------|---------------------|
| EXPRESS II        | 3            | Infliximab 5 mg/kg at week 0, 2, and 6, then<br>Q8W   | 50                | 134      | 72.4               | 54.5               | 34.3               |                     |
| ADACCESS          | 3            | Adalimumab 80 mg at week 0, then 40 mg<br>Q2W         | 51                | 115      | 93.9               | 79.6               | 51.0               | 29.6                |
| Gordon 2006       | 2            | Adalimumab 80 mg at week 0, then 40 mg<br>Q2W         | 60                | 45       | 64.0               | 56.0               | 33.0               | 16.0                |
| VOYAGE 1          | 3            | Adalimumab 80 mg at week 0, then 40 mg<br>Q2W         | 48                | 334      |                    | 62.6               | 47.9               | 23.4                |
| AMAGINE-2         | 3            | Ustekinumab 45 mg or 90 mg at week 0, 4,<br>then Q12W | 52                | 300      |                    | 62.0               | 48.0               | 30.0                |
| AMAGINE-3         | 3            | Ustekinumab 45 mg or 90 mg at week 0, 4,<br>then Q12W | 52                | 313      |                    | 63.0               | 50.0               | 29.0                |
| CLEAR             | 3b           | Ustekinumab 45 mg or 90 mg at week 0, 4,<br>then Q12W | 52                | 335      |                    | 78.2               | 60.6               | 36.7                |
| IXORA-S           | 3            | Ustekinumab 45 mg or 90 mg at week 0, 4,<br>then Q12W | 52                | 166      |                    | 75.9               | 59.0               | 35.5                |
| PSTELLAR          | 3            | Ustekinumab 45 mg or 90 mg at week 0, 4,<br>then Q12W | 52                | 69       |                    | 82.6               |                    |                     |



| <b>Trial Name</b>                                                                       | <b>Phase</b> | <b>Treatment Arm</b>                                                    | <b>Time Point</b> | <b>N</b> | <b>PASI 50 (%)</b> | <b>PASI 75 (%)</b> | <b>PASI 90 (%)</b> | <b>PASI 100 (%)</b> |
|-----------------------------------------------------------------------------------------|--------------|-------------------------------------------------------------------------|-------------------|----------|--------------------|--------------------|--------------------|---------------------|
| UltIMMa1                                                                                | 3            | Ustekinumab 45 mg or 90 mg at week 0, 4,<br>then Q12W                   | 52                | 100      | 87.0               | 70.0               | 44.0               | 21.0                |
| UltIMMa2                                                                                | 3            | Ustekinumab 45 mg or 90 mg at week 0, 4,<br>then Q12W                   | 52                | 99       | 85.9               | 76.8               | 50.5               | 30.3                |
| CLEAR                                                                                   | 3b           | Secukinumab 300 mg at week 0, 1, 2, and 3,<br>then Q4W                  | 52                | 334      |                    | 91.6               | 74.9               | 44.9                |
| Pooled analysis of<br>four trials<br>(ERASURE,<br>FEATURE,<br>FIXTURE, and<br>JUNCTURE) | 3            | Secukinumab 300 mg at week 0, 1, 2, and 3,<br>then Q4W                  | 52                | 686      |                    | 85.2               | 68.1               | 40.8                |
| IXORA-S                                                                                 | 3            | Ixekizumab 160 mg at week 0, 80 mg Q2W<br>until week 12, then 80 mg Q4W | 52                | 136      |                    | 88.2               | 76.5               | 52.2                |
| UNCOVER 3                                                                               | 3            | Ixekizumab 160 mg at week 0, 80 mg Q2W<br>until week 12, then 80 mg Q4W | 60                | 385      |                    | 83.0               | 73.0               | 55.0                |
| AMAGINE-2                                                                               | 3            | Brodalumab 210 mg at week 0, 1, 2, then Q2W                             | 52                | 189      |                    | 80.0               | 75.0               | 56.0                |
| AMAGINE-3                                                                               | 3            | Brodalumab 210 mg at week 0, 1, 2, then Q2W                             | 52                | 194      |                    | 80.0               | 73.0               | 53.0                |

| <b>Trial Name</b> | <b>Phase</b> | <b>Treatment Arm</b>                           | <b>Time Point</b> | <b>N</b> | <b>PASI 50 (%)</b> | <b>PASI 75 (%)</b> | <b>PASI 90 (%)</b> | <b>PASI 100 (%)</b> |
|-------------------|--------------|------------------------------------------------|-------------------|----------|--------------------|--------------------|--------------------|---------------------|
| Ohtsuki 2018      | 3            | Guselkumab 100 mg at week 0, 4, then Q8W       | 52                | 63       | 98.4               | 90.5               | 77.8               | 47.6                |
| VOYAGE 1          | 3            | Guselkumab 100 mg at week 0, 4, then Q8W       | 48                | 329      |                    | 87.8               | 76.3               | 47.4                |
| IMMvent           | 3            | Risankizumab 150 mg at week 0, 4, then<br>Q12W | 44                | 301      | 89.0               | 86.7               | 75.7               | 52.8                |
| UltIMMa1          | 3            | Risankizumab 150 mg at week 0, 4, then<br>Q12W | 52                | 304      | 94.4               | 91.8               | 81.9               | 56.3                |
| UltIMMa2          | 3            | Risankizumab 150 mg at week 0, 4, then<br>Q12W | 52                | 294      | 93.2               | 91.5               | 80.6               | 59.5                |

BID, twice daily; BIW, twice a week; EOW, every other week; kg, kilogram; mg, milligram; NMA, network-meta analysis; PASI, Psoriasis Area and Severity Index; Q12W, once every 12 weeks; Q2W, once every 2 weeks; Q4W, once every 4 weeks; Q8W, once every 8 weeks; QW, once weekly

**eFigure 1.** Estimated odds ratios from the NMA of short-term PASI (base-case)

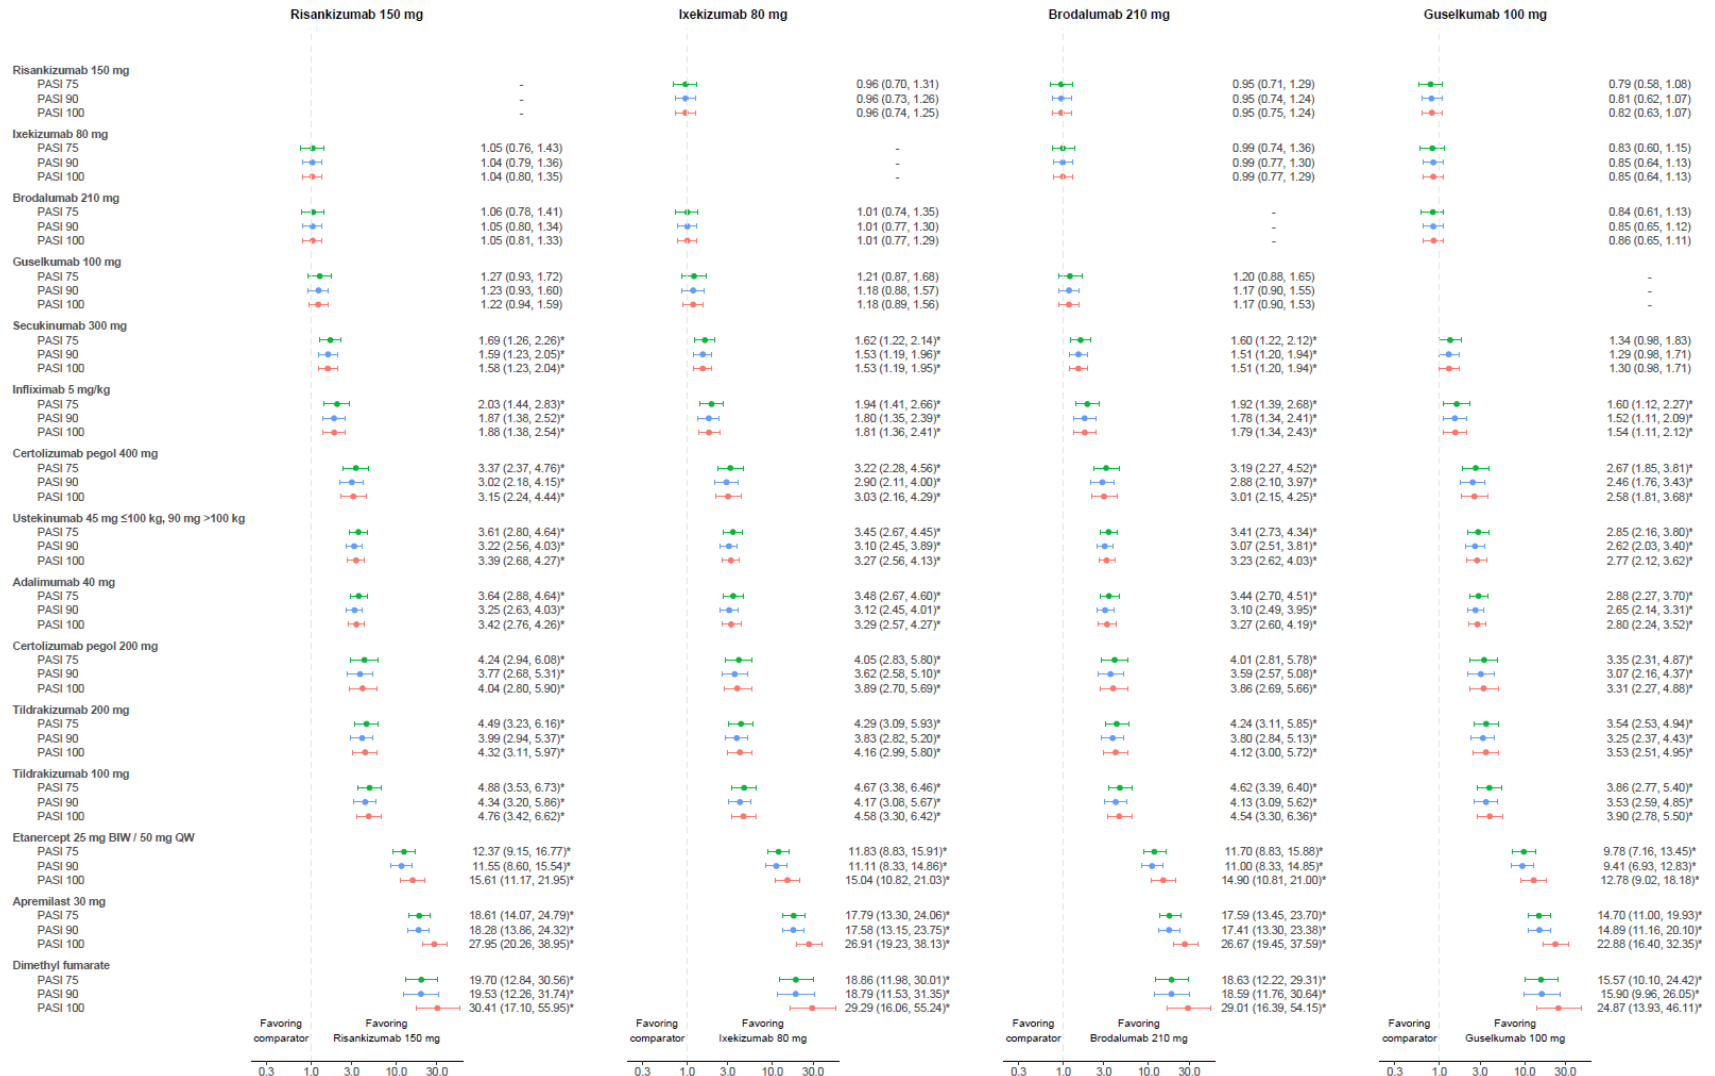

BIW, twice a week; kg, kilogram; mg, milligram; NMA, network meta-analysis; PASI, Psoriasis Area and Severity Index; PASI 75, 90, 100, a 75%, 90% or 100% decrease from baseline PASI; QW, once weekly

**eTable 2.** Estimated response rates from the NMA of short-term PASI (sensitivity analyses including global trials only, including phase III trials only, and in an expanded treatment space)

| Sensitivity analysis: global trials only   |                           |                |                           |                |                           |                |
|--------------------------------------------|---------------------------|----------------|---------------------------|----------------|---------------------------|----------------|
| Treatment                                  | PASI 75                   |                | PASI 90                   |                | PASI 100                  |                |
|                                            | Posterior Median, 95% CrI |                | Posterior Median, 95% CrI |                | Posterior Median, 95% CrI |                |
| Risankizumab 150 mg                        | 89.4%                     | (87.2%, 91.3%) | 71.7%                     | (67.8%, 75.4%) | 41.1%                     | (36.9%, 45.6%) |
| Ixekizumab 80 mg                           | 88.5%                     | (86.2%, 90.5%) | 70.0%                     | (66.1%, 73.7%) | 39.3%                     | (35.2%, 43.5%) |
| Brodalumab 210 mg                          | 88.0%                     | (85.8%, 90.1%) | 69.2%                     | (65.4%, 73.0%) | 38.3%                     | (34.4%, 42.6%) |
| Guselkumab 100 mg                          | 87.3%                     | (84.4%, 90.0%) | 68.0%                     | (63.2%, 72.9%) | 37.1%                     | (32.2%, 42.6%) |
| Secukinumab 300 mg                         | 82.6%                     | (79.9%, 85.2%) | 60.4%                     | (56.5%, 64.5%) | 29.7%                     | (26.3%, 33.5%) |
| Infliximab 5 mg/kg                         | 79.9%                     | (75.6%, 83.7%) | 56.5%                     | (50.8%, 62.2%) | 26.3%                     | (21.8%, 31.3%) |
| Certolizumab pegol 400 mg                  | 71.0%                     | (65.7%, 75.9%) | 45.2%                     | (39.4%, 51.2%) | 18.0%                     | (14.3%, 22.2%) |
| Ustekinumab 45 mg ≤ 100 kg, 90 mg > 100 kg | 69.4%                     | (66.1%, 72.7%) | 43.4%                     | (39.8%, 47.2%) | 16.8%                     | (14.5%, 19.3%) |
| Adalimumab 40 mg                           | 70.2%                     | (66.7%, 73.5%) | 44.3%                     | (40.4%, 48.1%) | 17.3%                     | (14.9%, 20.0%) |
| Certolizumab pegol 200 mg                  | 66.1%                     | (59.9%, 71.9%) | 39.8%                     | (33.6%, 46.3%) | 14.6%                     | (11.1%, 18.7%) |
| Tildrakizumab 100 mg                       | 63.0%                     | (57.8%, 68.1%) | 36.6%                     | (31.7%, 41.9%) | 12.7%                     | (10.1%, 15.8%) |
| Tildrakizumab 200 mg                       | 64.9%                     | (59.8%, 70.0%) | 38.6%                     | (33.5%, 44.0%) | 13.8%                     | (11.1%, 17.2%) |
| Etanercept 25 mg BIW / 50 mg QW            | 39.8%                     | (35.3%, 44.6%) | 17.6%                     | (14.7%, 20.9%) | 4.2%                      | (3.2%, 5.4%)   |
| Apremilast 30 mg                           | 31.8%                     | (27.7%, 36.2%) | 12.6%                     | (10.2%, 15.3%) | 2.6%                      | (1.9%, 3.4%)   |
| Dimethyl fumarate                          | 30.9%                     | (23.4%, 39.7%) | 12.1%                     | (8.1%, 17.5%)  | 2.5%                      | (1.4%, 4.2%)   |

| Placebo                                            | 5.1%                      | (4.6%, 5.7%)   | 1.1%                      | (0.9%, 1.2%)   | 0.1%                      | (0.1%, 0.1%)   |
|----------------------------------------------------|---------------------------|----------------|---------------------------|----------------|---------------------------|----------------|
| <b>Sensitivity analysis: phase III trials only</b> |                           |                |                           |                |                           |                |
| Treatment                                          | PASI 75                   |                | PASI 90                   |                | PASI 100                  |                |
|                                                    | Posterior Median, 95% CrI |                | Posterior Median, 95% CrI |                | Posterior Median, 95% CrI |                |
| Risankizumab 150 mg                                | 89.2%                     | (86.9%, 91.2%) | 71.6%                     | (67.5%, 75.4%) | 40.3%                     | (35.8%, 44.8%) |
| Ixekizumab 80 mg                                   | 88.7%                     | (86.4%, 90.7%) | 70.6%                     | (66.7%, 74.4%) | 39.2%                     | (35.0%, 43.5%) |
| Brodalumab 210 mg                                  | 87.6%                     | (85.1%, 89.8%) | 68.7%                     | (64.6%, 72.7%) | 37.1%                     | (32.9%, 41.5%) |
| Guselkumab 100 mg                                  | 86.8%                     | (83.9%, 89.5%) | 67.4%                     | (62.6%, 72.0%) | 35.7%                     | (31.0%, 40.8%) |
| Secukinumab 300 mg                                 | 82.8%                     | (80.0%, 85.4%) | 61.0%                     | (56.9%, 65.1%) | 29.5%                     | (26.0%, 33.3%) |
| Infliximab 5 mg/kg                                 | 80.0%                     | (75.5%, 84.2%) | 57.0%                     | (51.0%, 63.2%) | 26.0%                     | (21.3%, 31.6%) |
| Certolizumab pegol 400 mg                          | 69.3%                     | (62.7%, 75.3%) | 43.6%                     | (36.6%, 50.6%) | 16.4%                     | (12.3%, 21.2%) |
| Ustekinumab 45 mg ≤ 100 kg, 90 mg > 100 kg         | 69.1%                     | (65.6%, 72.4%) | 43.3%                     | (39.6%, 47.2%) | 16.2%                     | (13.9%, 18.8%) |
| Adalimumab 40 mg                                   | 69.9%                     | (66.3%, 73.3%) | 44.2%                     | (40.3%, 48.3%) | 16.8%                     | (14.3%, 19.5%) |
| Certolizumab pegol 200 mg                          | 65.3%                     | (58.5%, 71.6%) | 39.2%                     | (32.6%, 46.2%) | 13.8%                     | (10.2%, 18.0%) |
| Tildrakizumab 100 mg                               | 62.1%                     | (56.0%, 68.0%) | 36.0%                     | (30.3%, 42.1%) | 12.0%                     | (9.1%, 15.5%)  |
| Tildrakizumab 200 mg                               | 62.5%                     | (56.3%, 68.3%) | 36.4%                     | (30.6%, 42.5%) | 12.2%                     | (9.3%, 15.7%)  |
| Etanercept 25 mg BIW / 50 mg QW                    | 40.0%                     | (35.0%, 45.2%) | 17.9%                     | (14.7%, 21.6%) | 4.1%                      | (3.1%, 5.5%)   |
| Apremilast 30 mg                                   | 31.0%                     | (26.5%, 35.9%) | 12.3%                     | (9.8%, 15.2%)  | 2.4%                      | (1.7%, 3.3%)   |
| Dimethyl fumarate                                  | 29.8%                     | (22.1%, 38.6%) | 11.6%                     | (7.6%, 17.0%)  | 2.2%                      | (1.2%, 3.8%)   |

| Placebo                                               | 5.2%                      | (4.7%, 5.8%)   | 1.1%                      | (0.9%, 1.3%)   | 0.1%                      | (0.1%, 0.1%)   |
|-------------------------------------------------------|---------------------------|----------------|---------------------------|----------------|---------------------------|----------------|
| <b>Sensitivity analysis: expanded treatment space</b> |                           |                |                           |                |                           |                |
| Treatment                                             | PASI 75                   |                | PASI 90                   |                | PASI 100                  |                |
|                                                       | Posterior Median, 95% CrI |                | Posterior Median, 95% CrI |                | Posterior Median, 95% CrI |                |
| Risankizumab 150 mg                                   | 89.2%                     | (86.9%, 91.3%) | 71.6%                     | (67.5%, 75.5%) | 40.4%                     | (35.8%, 45.0%) |
| Ixekizumab 80 mg                                      | 88.4%                     | (86.0%, 90.5%) | 70.1%                     | (66.0%, 73.9%) | 38.7%                     | (34.3%, 43.0%) |
| Brodalumab 210 mg                                     | 88.7%                     | (86.4%, 90.9%) | 70.7%                     | (66.8%, 74.8%) | 39.4%                     | (35.2%, 44.1%) |
| Guselkumab 100 mg                                     | 86.8%                     | (83.7%, 89.4%) | 67.3%                     | (62.5%, 72.0%) | 35.7%                     | (30.9%, 40.8%) |
| Secukinumab 300 mg                                    | 83.5%                     | (80.8%, 86.1%) | 62.1%                     | (58.0%, 66.2%) | 30.6%                     | (27.0%, 34.6%) |
| Infliximab 5 mg/kg                                    | 80.3%                     | (76.4%, 83.9%) | 57.4%                     | (52.1%, 62.7%) | 26.5%                     | (22.2%, 31.2%) |
| Certolizumab pegol 400 mg                             | 71.1%                     | (65.2%, 76.6%) | 45.6%                     | (39.2%, 52.3%) | 17.7%                     | (13.8%, 22.4%) |
| Ustekinumab 45 mg ≤ 100 kg, 90 mg > 100 kg            | 69.8%                     | (66.4%, 73.3%) | 44.1%                     | (40.3%, 48.2%) | 16.8%                     | (14.4%, 19.5%) |
| Adalimumab 40 mg                                      | 69.6%                     | (66.2%, 72.8%) | 43.9%                     | (40.2%, 47.6%) | 16.6%                     | (14.3%, 19.1%) |
| Certolizumab pegol 200 mg                             | 66.2%                     | (59.4%, 72.6%) | 40.2%                     | (33.4%, 47.4%) | 14.4%                     | (10.6%, 18.9%) |
| Tildrakizumab 100 mg                                  | 63.0%                     | (57.2%, 68.6%) | 36.9%                     | (31.4%, 42.7%) | 12.5%                     | (9.7%, 15.9%)  |
| Tildrakizumab 200 mg                                  | 65.0%                     | (59.3%, 70.5%) | 38.9%                     | (33.3%, 45.0%) | 13.6%                     | (10.6%, 17.3%) |
| Etanercept 25 mg BIW / 50 mg QW                       | 40.2%                     | (35.5%, 45.3%) | 18.0%                     | (14.9%, 21.7%) | 4.2%                      | (3.2%, 5.5%)   |
| Ciclosporin 2.5–3 mg/kg                               | 43.7%                     | (32.6%, 55.4%) | 20.4%                     | (13.2%, 29.8%) | 5.0%                      | (2.7%, 8.9%)   |
| Methotrexate (high dose)                              | 44.4%                     | (34.5%, 54.4%) | 20.9%                     | (14.3%, 28.9%) | 5.2%                      | (3.0%, 8.5%)   |

|                         |       |                |       |               |      |              |
|-------------------------|-------|----------------|-------|---------------|------|--------------|
| Methotrexate (low dose) | 31.2% | (24.3%, 39.1%) | 12.4% | (8.6%, 17.2%) | 2.4% | (1.5%, 3.9%) |
| Apremilast 30 mg        | 30.9% | (26.8%, 35.1%) | 12.2% | (9.9%, 14.7%) | 2.4% | (1.8%, 3.1%) |
| Fumaric acid esters     | 31.2% | (25.1%, 37.6%) | 12.3% | (9.0%, 16.3%) | 2.4% | (1.6%, 3.6%) |
| Dimethyl fumarate       | 28.0% | (20.7%, 36.2%) | 10.6% | (6.9%, 15.4%) | 2.0% | (1.1%, 3.3%) |
| Acitretin 0.4 mg/kg     | 19.5% | (4.6%, 47.7%)  | 6.3%  | (0.9%, 23.5%) | 1.0% | (0.1%, 6.2%) |
| Placebo                 | 5.4%  | (4.8%, 5.9%)   | 1.1%  | (1.0%, 1.3%)  | 0.1% | (0.1%, 0.1%) |

BIW, twice a week; CI, confidence interval; CrI, credible interval; kg, kilogram; mg, milligram; NMA, network meta-analysis; PASI, Psoriasis Area and Severity Index; PASI 75, 90, 100, a 75%, 90% or 100% decrease from baseline PASI; QW, once weekly

**eFigure 2.** Estimated odds ratios from the meta-analysis of long-term PASI (base-case)

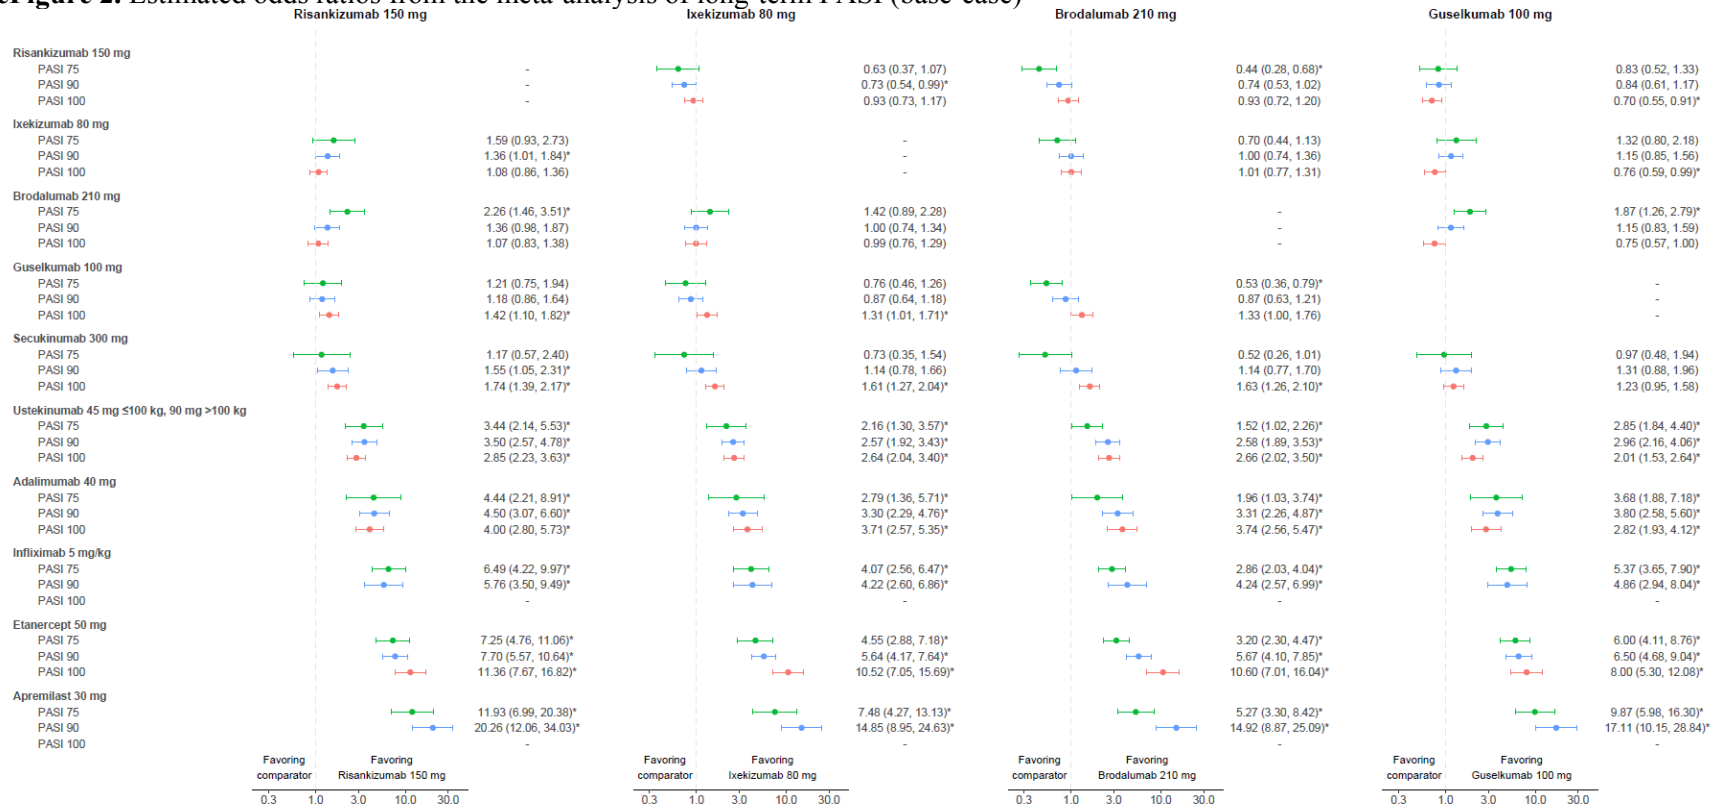

BIW, twice a week; kg, kilogram; mg, milligram; PASI, psoriasis area and severity index; PASI 75, 90, 100: a 75%, 90% or 100% decrease from baseline PASI



**eTable 3.** Estimated response rates from the meta-analysis of long-term PASI (sensitivity analyses: including global trials only, including trials reporting NRI data, and including phase III trials only)

| <b>Sensitivity analysis: global trials only</b>        |                              |                |                              |                |                              |                |
|--------------------------------------------------------|------------------------------|----------------|------------------------------|----------------|------------------------------|----------------|
| <b>Treatment</b>                                       | <b>PASI 75</b>               |                | <b>PASI 90</b>               |                | <b>PASI 100</b>              |                |
|                                                        | <b>Response Rate, 95% CI</b> |                | <b>Response Rate, 95% CI</b> |                | <b>Response Rate, 95% CI</b> |                |
| Risankizumab 150 mg                                    | 90.1%                        | (86.3%, 92.9%) | 79.4%                        | (75.5%, 82.9%) | 56.2%                        | (52.4%, 59.9%) |
| Guselkumab 100 mg                                      | 87.8%                        | (83.8%, 91.0%) | 76.3%                        | (71.4%, 80.6%) | 47.4%                        | (42.1%, 52.8%) |
| Brodalumab 210 mg                                      | 80.0%                        | (75.7%, 83.7%) | 74.0%                        | (69.3%, 78.1%) | 54.5%                        | (49.5%, 59.4%) |
| Ixekizumab 80 mg                                       | 85.0%                        | (79.2%, 89.4%) | 73.9%                        | (69.9%, 77.5%) | 54.3%                        | (50.0%, 58.5%) |
| Secukinumab 300 mg                                     | 88.6%                        | (80.6%, 93.6%) | 71.3%                        | (64.2%, 77.5%) | 42.4%                        | (38.5%, 46.4%) |
| Ustekinumab 45 mg≤100 kg, 90 mg>100 kg                 | 72.5%                        | (65.9%, 78.2%) | 52.4%                        | (47.1%, 57.7%) | 31.0%                        | (27.2%, 35.2%) |
| Adalimumab 40 mg                                       | 67.1%                        | (52.9%, 78.7%) | 46.2%                        | (38.6%, 53.9%) | 24.2%                        | (18.8%, 30.7%) |
| Infliximab 5 mg/kg                                     | 58.3%                        | (52.5%, 63.8%) | 40.1%                        | (30.0%, 51.1%) | -                            | -              |
| Etanercept 50 mg                                       | 55.5%                        | (50.1%, 60.9%) | 33.4%                        | (28.5%, 38.7%) | 10.1%                        | (7.3%, 13.9%)  |
| Apremilast 30 mg                                       | 44.7%                        | (29.4%, 61.0%) | 16.0%                        | (10.7%, 23.3%) | -                            | -              |
| <b>Sensitivity analysis: trials reporting NRI data</b> |                              |                |                              |                |                              |                |
| <b>Treatment</b>                                       | <b>PASI 75</b>               |                | <b>PASI 90</b>               |                | <b>PASI 100</b>              |                |
|                                                        | <b>Response Rate, 95% CI</b> |                | <b>Response Rate, 95% CI</b> |                | <b>Response Rate, 95% CI</b> |                |
| Risankizumab 150 mg                                    | 90.1%                        | (86.3%, 92.9%) | 79.4%                        | (75.5%, 82.9%) | 56.2%                        | (52.4%, 59.9%) |

| Guselkumab 100 mg                                  | 87.8%                 | (83.8%, 91.0%) | 76.3%                 | (71.4%, 80.6%) | 47.4%                 | (42.1%, 52.8%) |
|----------------------------------------------------|-----------------------|----------------|-----------------------|----------------|-----------------------|----------------|
| Secukinumab 300 mg                                 | 91.6%                 | (88.1%, 94.1%) | 74.9%                 | (69.9%, 79.2%) | 44.9%                 | (39.7%, 50.3%) |
| Brodalumab 210 mg                                  | 80.0%                 | (75.7%, 83.7%) | 74.0%                 | (69.3%, 78.1%) | 54.5%                 | (49.5%, 59.4%) |
| Ixekizumab 80 mg                                   | 85.0%                 | (79.2%, 89.4%) | 73.9%                 | (69.9%, 77.5%) | 54.3%                 | (50.0%, 58.5%) |
| Ustekinumab 45 mg ≤ 100 kg, 90 mg > 100 kg         | 71.1%                 | (64.2%, 77.0%) | 52.4%                 | (47.1%, 57.7%) | 31.0%                 | (27.2%, 35.2%) |
| Adalimumab 40 mg                                   | 61.8%                 | (56.8%, 66.5%) | 41.9%                 | (28.5%, 56.7%) | 22.0%                 | (16.7%, 28.4%) |
| Infliximab 5 mg/kg                                 | 58.3%                 | (52.5%, 63.8%) | 40.1%                 | (30.0%, 51.1%) | -                     | -              |
| Etanercept 50 mg                                   | 55.5%                 | (50.1%, 60.9%) | 33.4%                 | (28.5%, 38.7%) | 10.1%                 | (7.3%, 13.9%)  |
| Apremilast 30 mg                                   | 40.0%                 | (30.2%, 50.7%) | -                     | -              | -                     | -              |
| <b>Sensitivity analysis: phase III trials only</b> |                       |                |                       |                |                       |                |
| Treatment                                          | PASI 75               |                | PASI 90               |                | PASI 100              |                |
|                                                    | Response Rate, 95% CI |                | Response Rate, 95% CI |                | Response Rate, 95% CI |                |
| Risankizumab 150 mg                                | 90.1%                 | (86.3%, 92.9%) | 79.4%                 | (75.5%, 82.9%) | 56.2%                 | (52.4%, 59.9%) |
| Guselkumab 100 mg                                  | 88.2%                 | (84.6%, 91.1%) | 76.5%                 | (72.1%, 80.5%) | 47.4%                 | (42.5%, 52.4%) |
| Brodalumab 210 mg                                  | 80.0%                 | (75.7%, 83.7%) | 74.0%                 | (69.3%, 78.1%) | 54.5%                 | (49.5%, 59.4%) |
| Ixekizumab 80 mg                                   | 85.0%                 | (79.2%, 89.4%) | 73.9%                 | (69.9%, 77.5%) | 54.3%                 | (50.0%, 58.5%) |
| Secukinumab 300 mg                                 | 88.6%                 | (80.6%, 93.6%) | 71.3%                 | (64.2%, 77.5%) | 42.4%                 | (38.5%, 46.4%) |
| Ustekinumab 45 mg ≤ 100 kg, 90 mg > 100 kg         | 72.5%                 | (65.9%, 78.2%) | 52.4%                 | (47.1%, 57.7%) | 31.0%                 | (27.2%, 35.2%) |
| Adalimumab 40 mg                                   | 71.4%                 | (52.1%, 85.1%) | 48.7%                 | (44.1%, 53.3%) | 25.6%                 | (20.2%, 31.9%) |

|                    |       |                |       |                |       |               |
|--------------------|-------|----------------|-------|----------------|-------|---------------|
| Infliximab 5 mg/kg | 58.3% | (52.5%, 63.8%) | 40.1% | (30.0%, 51.1%) | -     | -             |
| Etanercept 50 mg   | 55.5% | (50.1%, 60.9%) | 33.4% | (28.5%, 38.7%) | 10.1% | (7.3%, 13.9%) |
| Apremilast 30 mg   | 52.7% | (41.4%, 63.8%) | 17.6% | (10.5%, 27.9%) | -     | -             |

BIW, twice a week; CI: confidence interval; CrI, credible interval; kg, kilogram; mg, milligram; NRI, non-response imputation; PASI, Psoriasis Area and Severity Index; PASI 75, 90, 100, a 75%, 90% or 100% decrease from baseline PASI

**eFigure 3.** Evidence network for NMA of long-term PASI

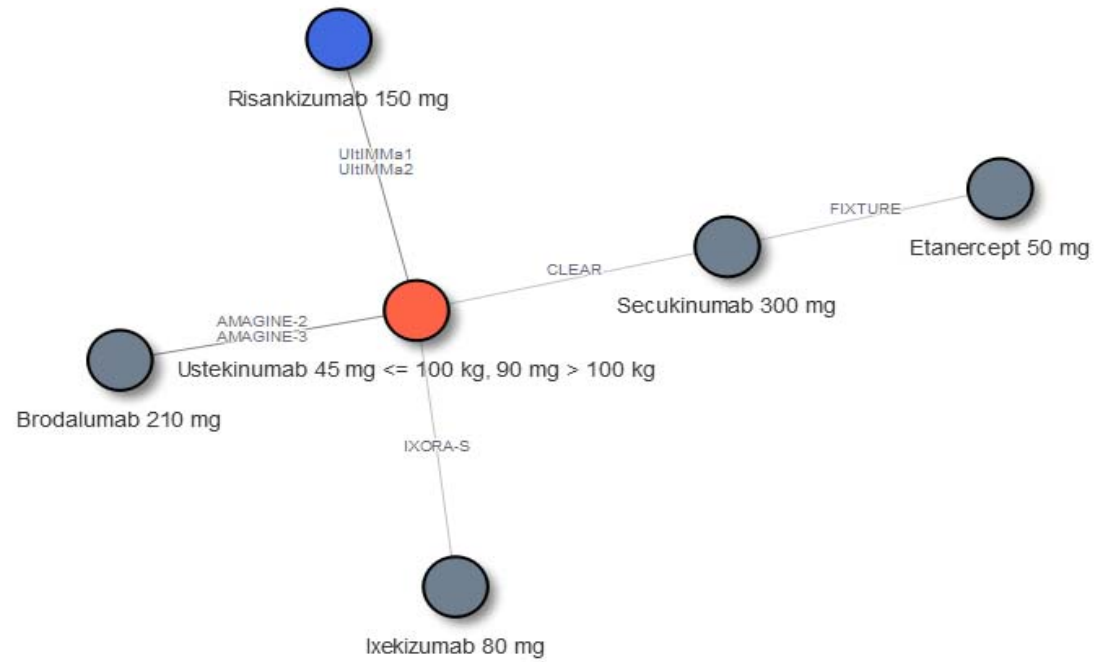

kg, kilogram; mg, milligram; NMA, network meta-analysis; PASI, Psoriasis Area and Severity Index

**eTable 4.** Estimated response rates from the NMA of long-term PASI

| Treatment                              | PASI 75                   |                | PASI 90                   |                | PASI 100                  |                |
|----------------------------------------|---------------------------|----------------|---------------------------|----------------|---------------------------|----------------|
|                                        | Posterior Median, 95% CrI |                | Posterior Median, 95% CrI |                | Posterior Median, 95% CrI |                |
| Risankizumab 150 mg                    | 91.1%                     | (87.6%, 93.8%) | 81.3%                     | (75.7%, 86.1%) | 59.7%                     | (52.1%, 67.1%) |
| Brodalumab 210 mg                      | 88.2%                     | (84.7%, 91.1%) | 76.6%                     | (71.3%, 81.4%) | 53.3%                     | (46.7%, 59.9%) |
| Ixekizumab 80 mg                       | 83.5%                     | (76.2%, 89.2%) | 69.8%                     | (60.1%, 78.3%) | 45.0%                     | (34.8%, 55.6%) |
| Secukinumab 300 mg                     | 80.1%                     | (74.7%, 84.8%) | 65.2%                     | (58.1%, 71.6%) | 39.9%                     | (32.9%, 47.3%) |
| Ustekinumab 45 mg≤100 kg, 90 mg>100 kg | 69.8%                     | (67.3%, 72.3%) | 52.5%                     | (49.3%, 55.7%) | 28.0%                     | (25.2%, 31.0%) |
| Etanercept 50 mg BIW                   | 53.8%                     | (44.1%, 63.5%) | 35.9%                     | (27.1%, 45.6%) | 15.7%                     | (10.4%, 22.6%) |

CrI, credible interval; kg, kilogram; mg, milligram; NMA, network meta-analysis; PASI, Psoriasis Area and Severity Index; PASI 75, 90, 100, a 75%, 90% or 100% decrease from baseline PASI

**eTable 5.** Estimated Odds Ratios for PASI 90 from the NMA of long-term PASI

|                         |                                                            |                               |                          |                          |                                |
|-------------------------|------------------------------------------------------------|-------------------------------|--------------------------|--------------------------|--------------------------------|
| <b>Etanercept 50 mg</b> | 1.97 (1.35, 2.91)*                                         | 3.34 (2.53, 4.42)*            | 4.13 (2.35, 7.34)*       | 5.86 (3.72, 9.36)*       | 7.80 (4.75, 12.94)*            |
| 0.51 (0.34, 0.74)*      | <b>Ustekinumab 45 mg<br/>≤100 kg, 90 mg &gt;100<br/>kg</b> | 1.69 (1.29, 2.22)*            | 2.09 (1.39, 3.21)*       | 2.97 (2.32, 3.83)*       | 3.95 (2.90, 5.45)*             |
| 0.30 (0.23, 0.39)*      | 0.59 (0.45, 0.78)*                                         | <b>Secukinumab 300<br/>mg</b> | 1.24 (0.75, 2.05)        | 1.76 (1.22, 2.54)*       | 2.33 (1.54, 3.56)*             |
| 0.24 (0.14, 0.42)*      | 0.48 (0.31, 0.72)*                                         | 0.81 (0.49, 1.32)             | <b>Ixekizumab 160 mg</b> | 1.42 (0.87, 2.30)        | 1.89 (1.12, 3.19)*             |
| 0.17 (0.11, 0.27)*      | 0.34 (0.26, 0.43)*                                         | 0.57 (0.39, 0.82)*            | 0.70 (0.44, 1.15)        | <b>Brodalumab 210 mg</b> | 1.33 (0.89, 1.99)              |
| 0.13 (0.08, 0.21)*      | 0.25 (0.18, 0.34)*                                         | 0.43 (0.28, 0.65)*            | 0.53 (0.31, 0.90)*       | 0.75 (0.50, 1.12)        | <b>Risankizumab 150<br/>mg</b> |
